# Supplementary material
Source: PubMed Central journal article supplement (PMC3807474)
Supplement: JB.00716-13_zjb999092802so1.pdf [file JB.00716-13_zjb999092802so1.pdf]

**Supplementary Table 1. Primers used in this study.**

| Purpose                                          | Primer                         | Sequence (5'--3') <sup>a</sup>                          |
|--------------------------------------------------|--------------------------------|---------------------------------------------------------|
| Construction of D7471 mutant                     | 7471 upstream-1                | CCGGA <u>AATTC</u> CACTTGGCCGTCAGCAG ( <i>EcoRI</i> )   |
|                                                  | 7471 upstream-2                | CACCTTCAGCTCCGTCGCCACTCCTTGGCGTTCCC                     |
|                                                  | 7471 downstream-1              | GGGAACGCCAAGGAGTGGCGACGGAGCTGAAGGGTG                    |
|                                                  | 7471 downstream-2              | GGA <u>AGATCT</u> CAGGACGACGACGGATT ( <i>BglII</i> )    |
|                                                  | 7471 v1                        | TACTGGAAGCGGACGGCG                                      |
|                                                  | 7471 v2                        | GCGCCCGGTGTCTTCAC                                       |
| Over-expression of SAV7471                       | E7471 forward                  | CCGGA <u>AATTC</u> CACTTGGCCGTCAGCAG ( <i>EcoRI</i> )   |
|                                                  | E7471 reverse                  | GGA <u>AGATCT</u> CACCCTTCAGTCCGTCG ( <i>BglII</i> )    |
| Construction of His <sub>6</sub> -tagged SAV7471 | His <sub>6</sub> -7471 forward | GAGATCGCAGTCGCCCC                                       |
|                                                  | His <sub>6</sub> -7471 reverse | CCG <u>TCTCGAG</u> GCGCAGGCCTCCAGG ( <i>XhoI</i> )      |
| Bacterial one-hybrid assay                       | B7471 forward                  | CGGGGTACCATGGAGATCGCAGTCGC ( <i>KpnI</i> )              |
|                                                  | B7471 reverse                  | GGA <u>AGATCT</u> CACCCTTCAGTCCGTCG ( <i>BglII</i> )    |
|                                                  | 7471p forward                  | ATT <u>TGCGGCCG</u> CCCAGTGGATGTCGCGTCG ( <i>NotI</i> ) |
|                                                  | 7471p reverse                  | CCGGA <u>AATTC</u> GGGATGCCTCTCCGTCG ( <i>EcoRI</i> )   |
| RT-PCR                                           | hrdB forward                   | TACTGCGCAGCCTCAACCAG                                    |
|                                                  | hrdB reverse                   | GCCGATCTGCTTGAGGTAGTC                                   |
|                                                  | aveR forward                   | TGGGCTGTGGAAGAGTACG                                     |
|                                                  | aveR reverse                   | TGACGGTCAGGCAGTAGTCC                                    |
|                                                  | aveA1 forward                  | ACGCTCCGACGTCTTCCG                                      |
|                                                  | aveA1 reverse                  | TTGTCCTCGGTCCACGGAG                                     |
|                                                  | SAV7472 forward                | ATGACCGACGACCGCCC                                       |
|                                                  | SAV7472 reverse                | CTCCCGCTCCTCGATCCG                                      |
|                                                  | SAV7473 forward                | CGTGACTGAACAGGCCGAG                                     |
|                                                  | SAV7473 reverse                | GCCGTCGAGCAGATCCAG                                      |
| EMSA and footprinting assay                      | Probe 1 forward                | GAACGGGCCACTCCTTG                                       |
|                                                  | Probe 1 reverse                | GGGATGCCTCTCCGTCG                                       |
|                                                  | Probe 2 forward                | CCAGTGGATGTCGCGTCG                                      |
|                                                  | Probe 2 reverse                | GGGATGCCTCTCCGTCG                                       |
|                                                  | Probe 3 forward                | GAACGGGCCACTCCTTG                                       |
|                                                  | Probe 3 reverse                | GCCGTGAGCAGTCCACG                                       |
|                                                  | Probe 4 forward                | CCAGTGGATGTCGCGTCG                                      |
|                                                  | Probe 4 reverse                | ATGGAGATCGCAGTCGCCC                                     |
|                                                  | Probe 5 forward                | ATGACCGACGACCGCCC                                       |
|                                                  | Probe 5 reverse                | GCCGTGAGCAGTCCACG                                       |
|                                                  | Probe 6 forward                | AAGCTGGTAGAGCCGTTGA (5'FAM labeled)                     |
|                                                  | Probe 6 reverse                | TCCTGGCACTCGTACTGGAAG                                   |
| 5'-RACE                                          | SP1-7471                       | GAACCACTGTCGACCCAG                                      |
|                                                  | SP2-7471                       | CCGGTGGTGGTCGACGTG                                      |
|                                                  | SP3-7471                       | CGACCAGCTGTTCTTGCC                                      |
|                                                  | SP1-7472                       | CCACTTGGCCGTCAGCAG                                      |
|                                                  | SP2-7472                       | CGAGTAGGCGAGCGAGACC                                     |
|                                                  | SP3-7472                       | CCGGTCTC GGGTGTCCAG                                     |

<sup>a</sup>The restriction enzyme sites are underlined.
